# Supplementary material
Source: PubMed Central journal article supplement (PMC8088507)
Supplement: JB.00535-20-s0001.pdf [file JB.00535-20-s0001.pdf]

**Figure S1.** Suppressor mutations reverse arginine-sensitive phenotype of  $\Delta spxA1$ . (A) Serial dilutions of overnight cultures of the UA-*perR*,  $\Delta spxA1$ , and  $\Delta spxA1$  arginine-tolerant revertants R4 and R7 spotted onto TYG agar or TYG agar supplemented with 0.5% arginine. The images shown are representative of three independent experiments. (B) WGS of arginine-tolerant revertants uncovered spontaneously-occurring mutations in the *smu997* and *smu998* genes.

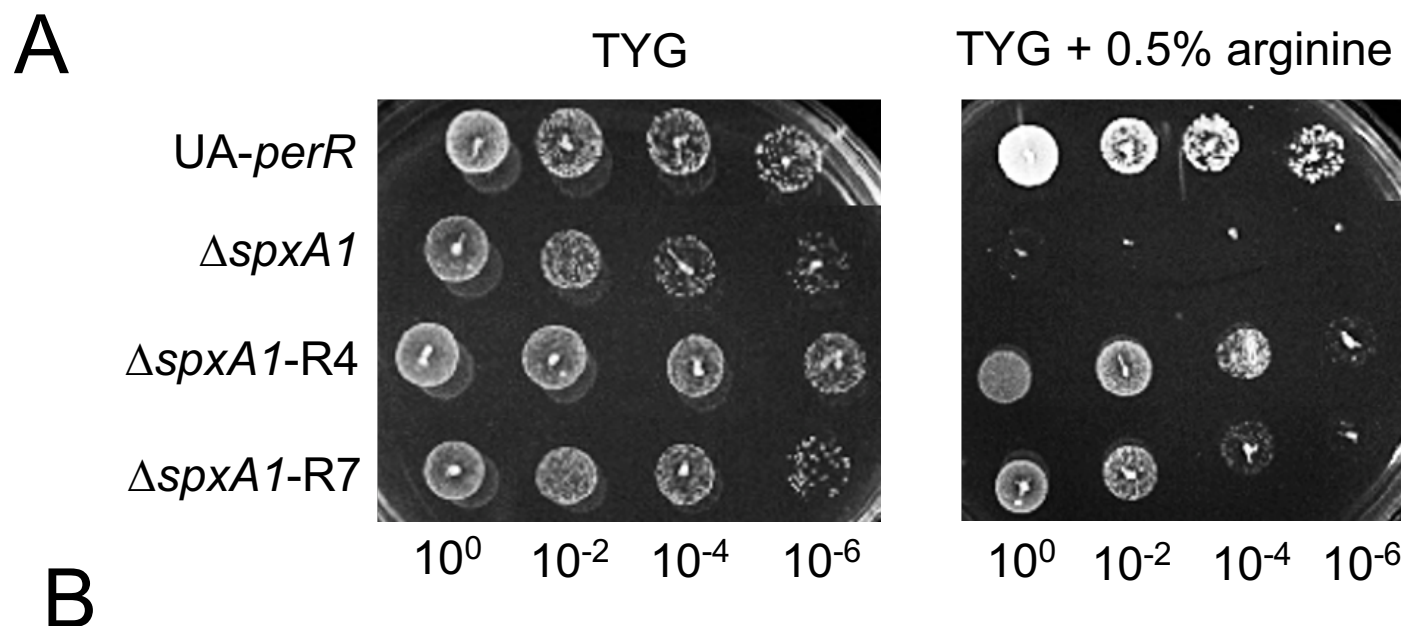

**B**

| $\Delta spxA1$ revertant | Gene name | Mutation    | Result |
|--------------------------|-----------|-------------|--------|
| R1                       | smu.998   | GCT --> GAT | A19D   |
| R4                       | smu.997   | GAA --> TAA | E94*   |
| R6                       | smu.997   | CAG --> CAT | Q152H  |
| R7                       | smu.998   | TGG --> TGA | W237*  |



**Figure S3. Strains lacking a functional PerR show a slight growth advantage in a 5% CO<sub>2</sub> atmosphere.** *S. mutans* UA159 (*perR*<sup>+</sup>), UA-*perR* (*perR*<sup>-</sup>), the *perR* deletion mutant strain (UAΔ*perR*) and complemented strain (UAΔ*perR*<sup>Comp</sup>) were grown in BHI medium at 37°C in a 5% CO<sub>2</sub> atmosphere. Data represent averages and standard deviations of results from four independent cultures.

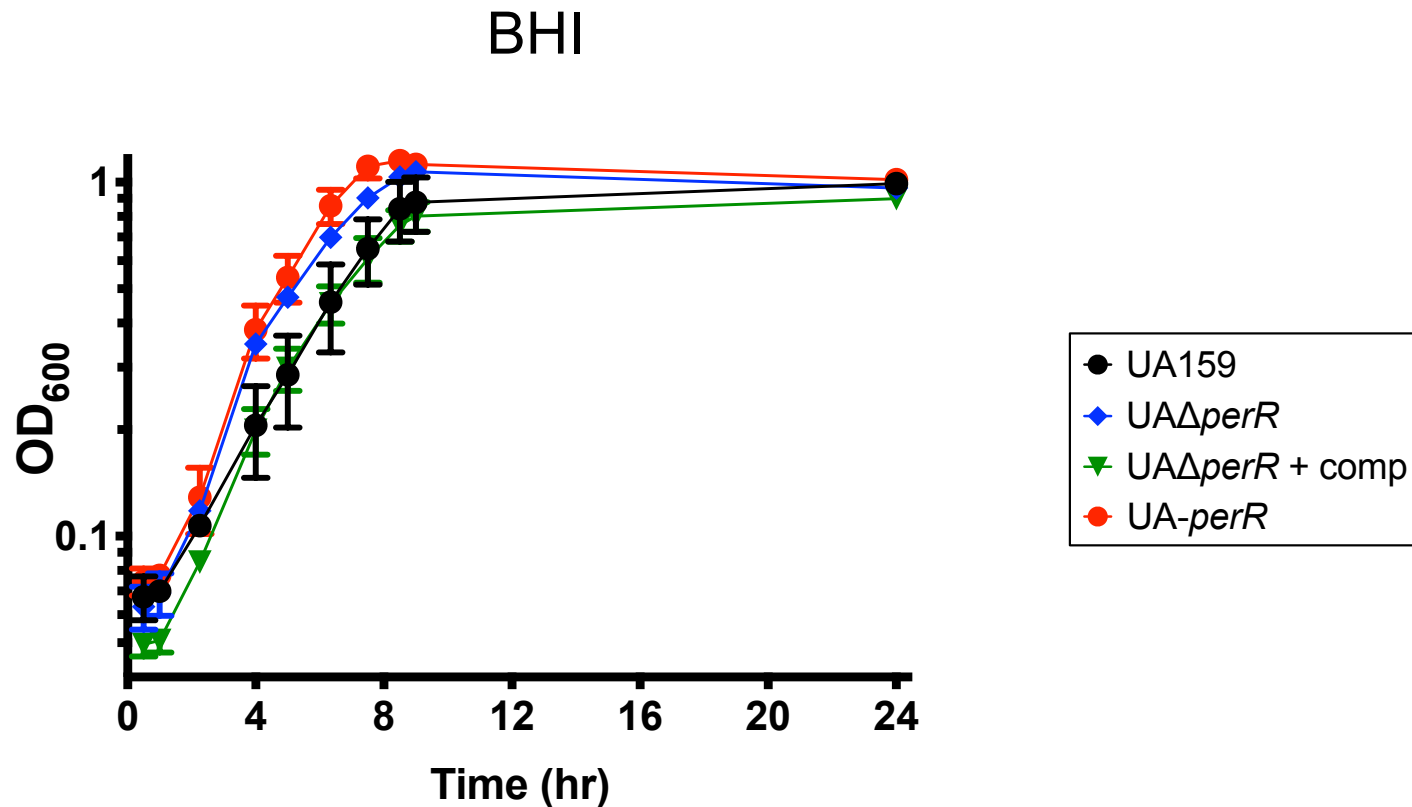

**Figure S4.** (A) Intracellular iron and manganese concentration as determined by ICP-MS analysis. (B) Western-blot analysis of whole cell lysates obtained from mid-log grown BHI cultures using anti-Dpr polyclonal antibody. The loading control stained with SYPRO Ruby is shown below.

**A**

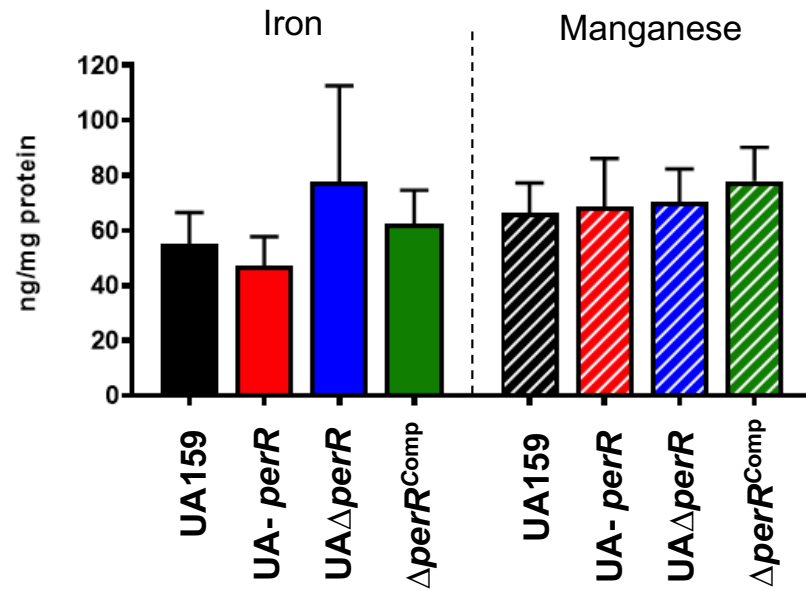

**B**

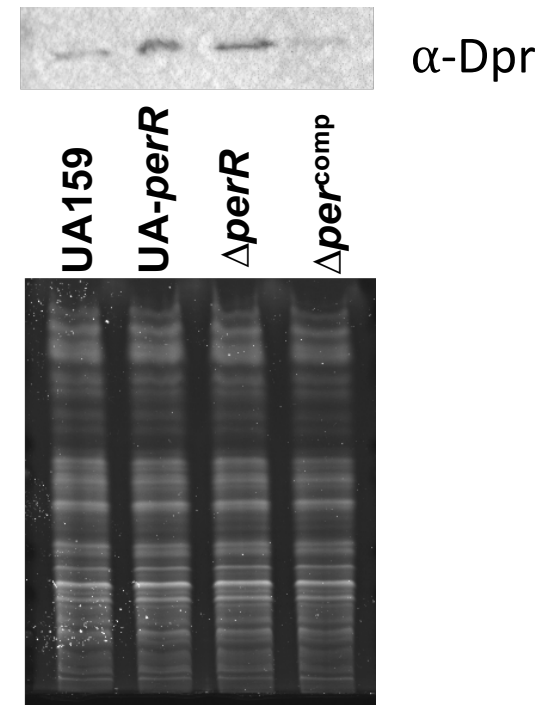

**Figure S5.** RT-qPCR analysis of genes lacking putative PerR-binding motifs. Bars represent the gene copy number and represent averages and SDs from three replicate samples. No significant differences were found when expression levels for each strain were compared to that of UA159 by ANOVA.

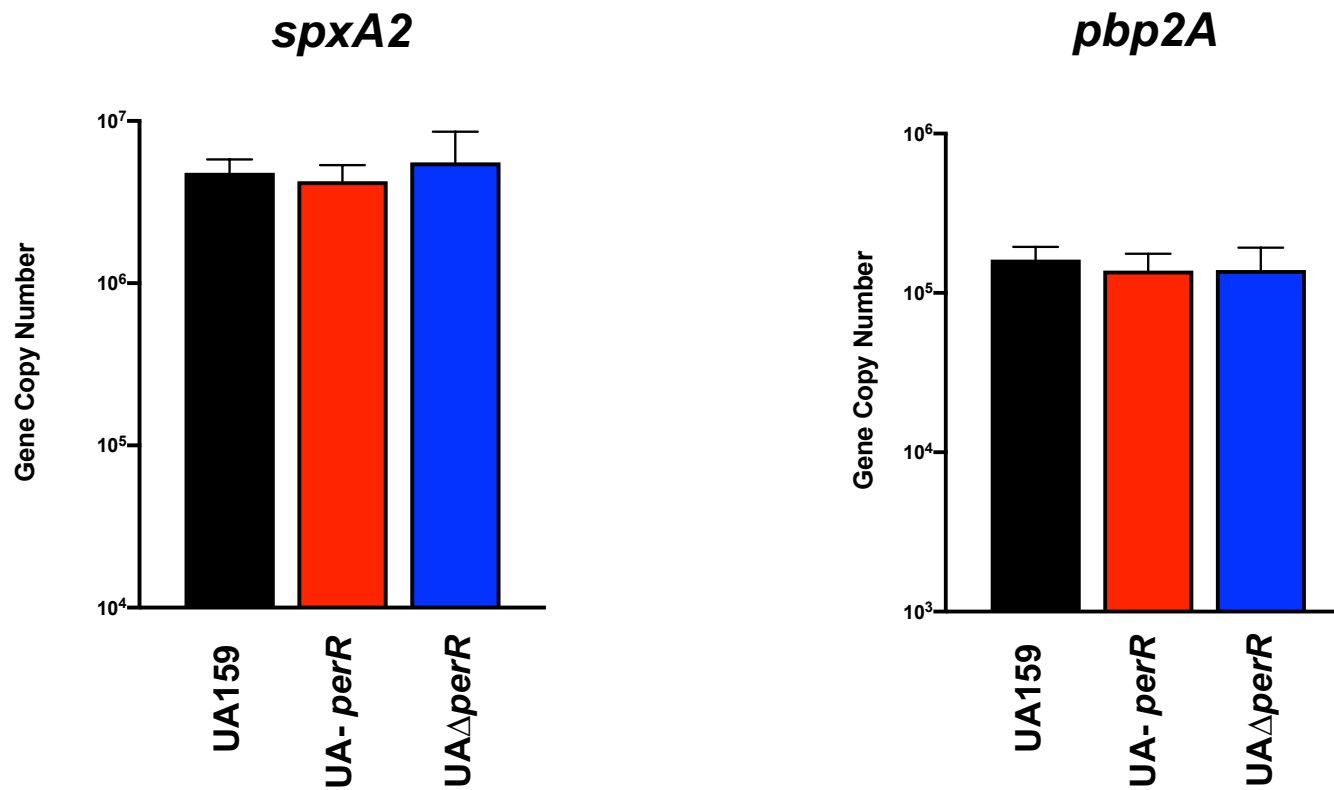

**Table S1. List of genes differentially expressed in *S. mutans* UA159 following exposure to H<sub>2</sub>O<sub>2</sub> stress as compared to unstressed controls**

| <b>Locus</b> | <b>Gene name, function</b>                             | <b>Fold change</b> | <b>P-value</b> |
|--------------|--------------------------------------------------------|--------------------|----------------|
| SMU_0043     | conserved hypothetical protein                         | 2.00               | 1.98E-04       |
| SMU_0044     | conserved hypothetical protein                         | 2.04               | 1.41E-03       |
| SMU_0061     | comR, transcriptional regulator                        | 2.92               | 1.52E-08       |
| SMU_0124     | putative transcriptional regulator (MarR family)       | 3.23               | 3.52E-06       |
| SMU_0125     | conserved hypothetical protein                         | 3.71               | 5.21E-07       |
| SMU_0127     | adhA, acetoin dehydrogenase E1 component alpha subunit | 3.30               | 1.11E-07       |
| SMU_0128     | adhB, acetoin dehydrogenase E1 component beta subunit  | 3.69               | 9.52E-07       |
| SMU_0129     | adhC, dihydrolipoamide S-acetyltransferase             | 3.77               | 9.69E-06       |
| SMU_0130     | adhD, dihydrolipoamide dehydrogenase                   | 3.88               | 2.44E-06       |
| SMU_0131     | lplA, lipoate-protein ligase                           | 3.68               | 4.23E-06       |
| SMU_0132     | hipO, amino acid amidohydrolase                        | 2.01               | 5.83E-06       |
| SMU_0143c    | def, polypeptide deformylase (PDF)                     | 2.63               | 2.37E-05       |
| SMU_0144c    | possible transcriptional regulator                     | 2.73               | 2.11E-05       |
| SMU_0150     | nImA, non-lantibiotic mutacin IV A                     | 0.41               | 1.20E-05       |
| SMU_0151     | nImB, non-lantibiotic mutacin IV B                     | 0.46               | 9.96E-06       |
| SMU_0152     | hypothetical protein                                   | 0.32               | 1.28E-04       |
| SMU_0153     | hypothetical protein                                   | 0.30               | 1.02E-03       |
| SMU_0182     | sloA, ABC transporter, ATP-binding protein             | 0.50               | 1.25E-05       |
| SMU_0184     | sloC, ABC transporter, substrate binding protein       | 0.45               | 2.61E-04       |
| SMU_0185     | hypothetical protein                                   | 0.34               | 8.08E-07       |
| SMU_0186     | sloR, metal-dependent transcriptional regulator        | 0.50               | 5.07E-05       |
| SMU_0187c    | dusA, tRNA-dihydrouridine synthase                     | 3.07               | 3.00E-07       |
| SMU_0188c    | hsIO, putative 33 kD chaperonin (heat shock protein)   | 3.09               | 4.17E-08       |
| SMU_0234     | ilvA, threonine dehydratase                            | 2.00               | 7.62E-06       |
| SMU_0247     | sufC, ABC transporter, ATP-binding protein             | 3.70               | 9.74E-09       |
| SMU_0248     | sufD, ABC transporter permease                         | 3.52               | 3.55E-08       |
| SMU_0249     | sufS, class-V aminotransferase                         | 3.48               | 4.77E-08       |
| SMU_0250     | sufU, nitrogen fixation-like protein                   | 3.73               | 7.37E-09       |

|           |                                                            |      |          |
|-----------|------------------------------------------------------------|------|----------|
| SMU_0251  | <u>suFB, ABC transporter permease</u>                      | 3.25 | 9.85E-08 |
| SMU_0260  | conserved hypothetical protein                             | 3.16 | 5.05E-06 |
| SMU_0271  | ptxB, PTS enzyme IIB component                             | 2.29 | 2.75E-07 |
| SMU_0273  | rmpD, hexulose-6-phosphate synthase                        | 2.01 | 2.19E-06 |
| SMU_0274  | rmpE, hexulose-6-phosphate isomerase                       | 2.23 | 7.56E-07 |
| SMU_0275  | rmpF, L-ribulose 5-phosphate 4-epimerase                   | 2.16 | 1.79E-06 |
| SMU_0277  | hypothetical protein                                       | 0.41 | 1.03E-04 |
| SMU_0278  | hypothetical protein                                       | 0.43 | 2.86E-04 |
| SMU_0279  | hypothetical protein                                       | 0.35 | 2.96E-05 |
| SMU_0281  | hypothetical protein                                       | 0.34 | 1.46E-06 |
| SMU_0283  | hypothetical protein                                       | 0.39 | 1.39E-06 |
| SMU_0284  | nlnT, transport and processing of non-lantibiotic mutacins | 0.48 | 1.05E-04 |
| SMU_0285  | nlnE, transport and processing of non-lantibiotic mutacins | 0.45 | 6.75E-05 |
| SMU_0328  | putative carbonic anhydrase                                | 2.67 | 1.55E-05 |
| SMU_0329  | conserved hypothetical protein                             | 2.39 | 3.38E-05 |
| SMU_0348  | pht, histidine triad (HIT) hydrolase                       | 3.29 | 4.07E-07 |
| SMU_0349  | ksgA, dimethyladenosine transferase                        | 3.20 | 1.01E-05 |
| SMU_0350  | hypothetical protein                                       | 3.09 | 1.21E-05 |
| SMU_0424  | copY, negative transcriptional regulator                   | 2.36 | 2.38E-06 |
| SMU_0426  | copA, copper-transporting ATPase                           | 2.27 | 1.33E-06 |
| SMU_0427  | copZ, copper chaperone                                     | 2.12 | 6.99E-05 |
| SMU_0438c | NADPH-dependent glutamate synthase (small subunit)         | 0.42 | 2.27E-06 |
| SMU_0463  | trxB, thioredoxin reductase                                | 3.37 | 7.45E-08 |
| SMU_0478  | gmk, putative guanylate kinase                             | 2.44 | 2.81E-07 |
| SMU_0479  | rpoZ, DNA-directed RNA polymerase, omega subunit           | 2.15 | 4.23E-06 |
| SMU_0486  | liaS, two-component sensor histidine kinase                | 0.50 | 3.10E-05 |
| SMU_0487  | liaR, two-component response regulator                     | 0.50 | 3.93E-04 |
| SMU_0502  | conserved hypothetical protein                             | 0.46 | 6.97E-04 |
| SMU_0503c | Hypothetical protein                                       | 0.46 | 2.27E-04 |
| SMU_0524  | ABC transporter ATP-binding/permease protein               | 2.53 | 7.70E-06 |
| SMU_0525  | ABC transporter ATP-binding/permease protein               | 2.44 | 8.45E-06 |
| SMU_0540  | dpr, peroxide resistance protein/iron binding protein      | 3.97 | 3.41E-06 |
| SMU_0562  | clpE, ATP-dependent protease                               | 2.67 | 2.09E-07 |

|           |                                                               |      |          |
|-----------|---------------------------------------------------------------|------|----------|
| SMU_0569  | feoA, ferrous ion transport protein A                         | 0.45 | 4.20E-05 |
| SMU_0570  | feoB, ferrous ion transport protein B                         | 0.50 | 3.65E-04 |
| SMU_0593  | perR, peroxidase regulator                                    | 2.04 | 2.93E-04 |
| SMU_0594  | hypothetical protein                                          | 2.38 | 5.88E-05 |
| SMU_0609  | bsp, cell wall protein precursor                              | 0.50 | 7.29E-04 |
| SMU_0629  | soda, superoxide dismutase                                    | 4.67 | 1.24E-06 |
| SMU_0634  | queA, tRNA ribosyltransferase-isomerase                       | 2.43 | 5.15E-05 |
| SMU_0666  | argD, N-acetylornithine aminotransferase                      | 2.13 | 3.08E-04 |
| SMU_0667  | nrdf, ribonucleotide reductase, small subunit                 | 2.92 | 2.92E-07 |
| SMU_0668c | nrda, ribonucleotide reductase, large subunit                 | 2.59 | 9.43E-06 |
| SMU_0669c | nrh, glutaredoxin                                             | 2.79 | 4.27E-06 |
| SMU_0670  | citB, aconitate hydratase; aconitase A                        | 0.43 | 1.42E-04 |
| SMU_0671  | citZ, citrate synthase                                        | 0.45 | 7.41E-05 |
| SMU_0676  | gapN, NADP-dependent glyceraldehyde-3-phosphate dehydrogenase | 2.64 | 6.05E-06 |
| SMU_0688  | conserved hypothetical protein                                | 0.35 | 4.31E-04 |
| SMU_0707c | endolysin                                                     | 2.06 | 3.42E-06 |
| SMU_0747c | conserved hypothetical protein                                | 2.21 | 7.20E-05 |
| SMU_0748  | hypothetical protein                                          | 2.45 | 8.37E-06 |
| SMU_0764  | ahpC, alkyl hydroperoxide reductase, subunit C                | 5.02 | 1.00E-08 |
| SMU_0765  | ahpF, alkyl hydroperoxide reductase, subunit F                | 4.72 | 2.46E-08 |
| SMU_0817  | glnH, amino acid ABC transporter, substrate-binding protein   | 0.49 | 3.03E-04 |
| SMU_0819  | mscL, large conductance mechanosensitive channel              | 3.01 | 2.08E-04 |
| SMU_0838  | gor, glutathione reductase                                    | 4.41 | 4.40E-07 |
| SMU_0841  | folC, putative folyl-polyglutamate synthetase                 | 2.26 | 1.62E-06 |
| SMU_0842  | conserved hypothetical protein                                | 2.16 | 2.58E-06 |
| SMU_0876  | msmR, MSM operon regulatory protein                           | 0.41 | 1.20E-04 |
| SMU_0877  | agal, alpha-galactosidase                                     | 0.39 | 1.11E-03 |
| SMU_0878  | msmE, sugar-binding protein                                   | 0.42 | 1.75E-03 |
| SMU_0891  | hsdM, DNA methylase                                           | 0.48 | 1.70E-03 |
| SMU_0911c | hypothetical protein                                          | 2.15 | 8.86E-04 |
| SMU_0917c | tetrahydropterin synthase                                     | 0.47 | 7.46E-04 |
| SMU_0921  | rcrR, transcriptional regulator                               | 2.32 | 3.95E-06 |
| SMU_0922  | rcrP, ABC transporter ATP-binding protein                     | 2.10 | 1.05E-05 |



|           |                                                                |      |          |
|-----------|----------------------------------------------------------------|------|----------|
| SMU_0923  | rerQ, ABC transporter ATP-binding protein                      | 2.11 | 6.76E-05 |
| SMU_0924  | tpx, thiol peroxidase                                          | 6.57 | 1.94E-06 |
| SMU_0925  | cipl, bacteriocin immunity protein                             | 3.45 | 1.18E-05 |
| SMU_0929c | conserved hypothetical protein                                 | 4.75 | 1.83E-05 |
| SMU_0956  | cipl, ATP-dependent Clp protease, ATP-binding subunit          | 2.16 | 3.39E-06 |
| SMU_0991  | putative ribonucleotide reductase                              | 3.80 | 5.83E-06 |
| SMU_1071c | conserved hypothetical protein                                 | 3.41 | 1.37E-08 |
| SMU_1073  | fhs, formate-tetrahydrofolate ligase                           | 2.68 | 2.06E-06 |
| SMU_1117  | nox, H2O-forming NADH Oxidase                                  | 3.83 | 1.25E-03 |
| SMU_1124  | pdp, putative pyrimidine-nucleoside phosphorylase              | 0.37 | 6.11E-04 |
| SMU_1125c | conserved hypothetical protein                                 | 0.36 | 2.68E-04 |
| SMU_1208c | hypothetical protein                                           | 0.42 | 8.44E-04 |
| SMU_1209c | hypothetical protein                                           | 0.43 | 1.77E-03 |
| SMU_1210  | parE, DNA topoisomerase IV subunit B                           | 0.44 | 4.97E-06 |
| SMU_1235  | thdF, tRNA modification GTPase                                 | 2.08 | 4.92E-05 |
| SMU_1287  | transcriptional regulator                                      | 2.17 | 2.94E-05 |
| SMU_1296  | yghU, glutathione S-transferase                                | 3.46 | 1.12E-05 |
| SMU_1297  | conserved hypothetical protein, DHH family                     | 3.90 | 2.51E-09 |
| SMU_1307c | conserved hypothetical protein                                 | 0.49 | 7.54E-04 |
| SMU_1317c | hypothetical protein                                           | 0.50 | 1.53E-04 |
| SMU_1368  | hypothetical protein                                           | 2.01 | 1.13E-03 |
| SMU_1394  | lepA, putative GTP-binding protein                             | 2.15 | 5.12E-06 |
| SMU_1395c | Hypothetical protein                                           | 2.05 | 1.74E-03 |
| SMU_1396  | gbpC, glucan-binding protein C                                 | 2.42 | 5.49E-06 |
| SMU_1412c | ABC transporter, ATP-binding and permease fusion protein       | 0.47 | 7.76E-07 |
| SMU_1451  | aldB, alpha-acetolactate decarboxylase                         | 3.16 | 5.76E-07 |
| SMU_1452  | alsS, alpha-acetolactate synthase                              | 2.91 | 1.14E-06 |
| SMU_1476c | GTP-binding protein                                            | 2.31 | 6.90E-07 |
| SMU_1509  | rggD, transcriptional regulator                                | 0.44 | 1.23E-04 |
| SMU_1519  | glnQ, putative amino acid ABC transporter, ATP-binding protein | 0.44 | 2.77E-05 |
| SMU_1520  | glnH, amino acid ABC transporter, substrate-binding protein    | 0.42 | 2.52E-05 |
| SMU_1523  | endA, membrane endonuclease                                    | 2.05 | 2.15E-05 |
| SMU_1524c | hypothetical protein                                           | 2.47 | 2.47E-06 |

|           |                                                                      |      |          |
|-----------|----------------------------------------------------------------------|------|----------|
| SMU_1525  | murA, carboxyvinyltransferase                                        | 2.20 | 1.98E-06 |
| SMU_1563  | pacL, putative cation-transporting P-type ATPase                     | 2.17 | 1.72E-04 |
| SMU_1566  | malR, maltose operon transcriptional repressor                       | 2.97 | 2.18E-07 |
| SMU_1572  | murZ, UDP-N-acetylglucosamine 1-carboxyvinyltransferase              | 2.23 | 3.49E-05 |
| SMU_1593c | conserved hypothetical protein                                       | 2.45 | 1.95E-05 |
| SMU_1629c | cell division protein                                                | 2.20 | 3.64E-04 |
| SMU_1641c | conserved hypothetical protein                                       | 2.11 | 3.12E-04 |
| SMU_1645  | tehB, tellurite resistance protein                                   | 3.10 | 1.67E-07 |
| SMU_1649  | exoA, exodeoxyribonuclease III/ Smx nuclease                         | 3.82 | 2.05E-05 |
| SMU_1650  | end3, endonuclease III                                               | 2.95 | 5.40E-05 |
| SMU_1665  | livF, branched chain amino acid ABC transporter, ATP-binding protein | 2.08 | 1.28E-05 |
| SMU_1666  | livG, branched chain amino acid ABC transporter, ATP-binding protein | 2.24 | 4.82E-06 |
| SMU_1667  | livM, branched chain amino acid ABC transporter, permease            | 2.45 | 2.01E-06 |
| SMU_1668  | livH, putative branched chain amino acid ABC transporter             | 2.37 | 1.10E-06 |
| SMU_1669  | livK, putative ABC transporter, branched chain amino acid-binding    | 2.53 | 1.49E-06 |
| SMU_1692  | pflA, pyruvate-formate lyase activating enzyme                       | 3.50 | 8.51E-08 |
| SMU_1700c | cidB, LrgB-like protein                                              | 2.48 | 1.23E-04 |
| SMU_1701c | cidA, conserved hypothetical protein                                 | 2.44 | 2.17E-04 |
| SMU_1702c | pgpB, phosphatase                                                    | 3.00 | 9.96E-05 |
| SMU_1703c | conserved hypothetical protein                                       | 3.35 | 2.19E-05 |
| SMU_1722c | putative integral membrane protein                                   | 2.15 | 3.36E-04 |
| SMU_1750c | hypothetical protein                                                 | 2.33 | 1.54E-03 |
| SMU_1753c | CRISPR2-Cas related                                                  | 2.20 | 3.50E-05 |
| SMU_1754c | CRISPR2-Cas related                                                  | 2.44 | 9.55E-07 |
| SMU_1755c | CRISPR2-Cas related                                                  | 2.32 | 9.91E-06 |
| SMU_1757c | CRISPR2-Cas related                                                  | 2.06 | 1.45E-05 |
| SMU_1758c | CRISPR2-Cas related                                                  | 2.56 | 2.22E-05 |
| SMU_1760c | conserved hypothetical protein                                       | 2.85 | 1.50E-04 |
| SMU_1761c | conserved hypothetical protein                                       | 3.10 | 3.03E-05 |
| SMU_1762c | conserved hypothetical protein                                       | 3.67 | 5.45E-06 |
| SMU_1763c | CRISPR2-Cas related                                                  | 3.68 | 8.62E-06 |
| SMU_1764c | conserved hypothetical protein                                       | 4.27 | 6.10E-06 |
| SMU_1787c | preprotein translocase, YajC subunit                                 | 3.01 | 4.62E-06 |

|           |                                                           |      |          |
|-----------|-----------------------------------------------------------|------|----------|
| SMU_1788c | bia, bacterocin transport accessory protein               | 4.37 | 2.47E-07 |
| SMU_1812  | tpn, transposase                                          | 2.52 | 3.19E-06 |
| SMU_1813  | transposase                                               | 3.46 | 7.16E-07 |
| SMU_1814  | senK, histidine kinase                                    | 2.98 | 1.35E-07 |
| SMU_1815  | senR, response regulator                                  | 3.29 | 6.69E-09 |
| SMU_1849  | comEB, deoxycytidylate deaminase; late competence protein | 2.50 | 4.03E-07 |
| SMU_1850  | pepP, aminopeptidase P                                    | 2.74 | 5.75E-08 |
| SMU_1851  | uvrA, excinuclease ABC subunit A                          | 3.26 | 7.63E-08 |
| SMU_1865  | mutY, A/G-specific adenine glycosylase                    | 3.15 | 2.95E-07 |
| SMU_1867c | adhB, putative alcohol dehydrogenase                      | 3.60 | 6.80E-06 |
| SMU_1869  | trxA, thioredoxin                                         | 4.75 | 1.02E-05 |
| SMU_1916  | comD, histidine kinase of the competence regulon          | 2.36 | 1.59E-04 |
| SMU_1917  | comE, response regulator                                  | 2.48 | 2.18E-05 |
| SMU_1955  | groES, co-chaperonin                                      | 2.02 | 5.00E-05 |
| SMU_1963c | levQ, sugar-binding periplasmic protein                   | 0.48 | 1.64E-03 |
| SMU_1964c | levR, two-component response regulator                    | 0.43 | 7.82E-04 |
| SMU_1965c | levS, histidine kinase                                    | 0.46 | 1.15E-04 |
| SMU_1966c | levT, ABC transport ribose-binding protein                | 0.44 | 3.21E-04 |
| SMU_1968c | conserved hypothetical protein                            | 0.49 | 4.20E-04 |
| SMU_1988c | probable DNA binding protein                              | 4.56 | 3.29E-08 |
| SMU_1993  | adcB, zinc ABC transporter, permease                      | 2.11 | 9.55E-06 |
| SMU_1994  | adcC, zinc ABC transport, ATP-binding protein             | 2.15 | 4.12E-07 |
| SMU_1995c | adcR, zinc transport transcriptional repressor            | 2.05 | 5.96E-06 |
| SMU_2027  | transcriptional regulator                                 | 2.44 | 5.96E-06 |
| SMU_2036  | pepO, endopeptidase O                                     | 2.68 | 1.40E-04 |
| SMU_2043c | dtd, D-tyrosyl-tRNA deacylase                             | 2.03 | 2.12E-05 |
| SMU_2044  | relA, GTP pyrophosphokinase                               | 2.34 | 9.76E-08 |
| SMU_2072c | acetyltransferase                                         | 0.43 | 5.41E-04 |
| SMU_2077c | conserved hypothetical protein                            | 2.27 | 1.74E-06 |
| SMU_2078c | Holliday junction resolvase-like protein                  | 2.03 | 5.19E-06 |
| SMU_2102  | hiss, histidine-tRNA synthetase                           | 3.06 | 2.33E-07 |
| SMU_2129c | conserved hypothetical protein                            | 2.09 | 8.08E-04 |
| SMU_2142  | rpiA, putative sugar-phosphate isomerase                  | 2.35 | 5.99E-07 |



**Table S2. List of genes differentially expressed in *S. mutans* UA~~Aper~~R as compared to UA159**

| Locus     | Gene name, function                             | Unstressed  |          | 5 min H <sub>2</sub> O <sub>2</sub> |          |
|-----------|-------------------------------------------------|-------------|----------|-------------------------------------|----------|
|           |                                                 | Fold change | P-value  | Fold change                         | P-value  |
| SMU_0026  | plsX, fatty acid/phospholipid synthesis protein | 2.02        | 1.38E-06 | 2.02                                | 1.38E-06 |
| SMU_0027  | acpP, acyl carrier protein                      | 2.52        | 1.82E-06 | 2.52                                | 1.82E-06 |
| SMU_0028  | comA, ABC transporter, ATP-binding protein      | 2.04        | 1.88E-04 | 2.04                                | 1.88E-04 |
| SMU_0083  | dnaJ, co-chaperone protein DnaJ                 | 2.10        | 3.72E-05 | 2.10                                | 3.72E-05 |
| SMU_0087  | conserved hypothetical protein                  | 2.08        | 3.56E-04 | 2.08                                | 3.56E-04 |
| SMU_0185  | hypothetical protein                            | 2.02        | 2.36E-05 | 2.97                                | 8.24E-07 |
| SMU_0193c | conserved hypothetical protein                  | 0.31        | 1.40E-04 | 0.23                                | 5.10E-05 |
| SMU_0194c | conserved hypothetical protein                  | 0.31        | 1.37E-05 | 0.29                                | 2.44E-05 |
| SMU_0195c | hypothetical protein                            | 0.22        | 2.34E-08 | 0.25                                | 1.43E-07 |
| SMU_0196c | immunogenic secreted protein (transfer protein) | 0.19        | 4.75E-08 | 0.17                                | 4.30E-08 |
| SMU_0197c | hypothetical protein                            | 0.21        | 1.89E-08 | 0.15                                | 2.58E-09 |
| SMU_0198c | tpn, conjugative transposon protein             | 0.24        | 1.35E-07 | 0.17                                | 2.25E-08 |
| SMU_0199c | hypothetical protein                            | 0.23        | 7.67E-07 | 0.13                                | 8.96E-08 |
| SMU_0200c | hypothetical protein                            | 0.21        | 4.01E-06 | 0.14                                | 1.47E-06 |
| SMU_0201c | conserved hypothetical protein                  | 0.26        | 2.41E-06 | 0.17                                | 2.31E-07 |
| SMU_0202c | Streptococcus-specific protein                  | 0.20        | 3.87E-07 | 0.13                                | 9.23E-08 |
| SMU_0204c | hypothetical protein                            | 0.17        | 7.70E-07 | 0.10                                | 1.78E-07 |
| SMU_0205c | conserved hypothetical protein                  | 0.17        | 4.02E-09 | 0.14                                | 2.95E-09 |
| SMU_0206c | hypothetical protein                            | 0.24        | 2.36E-06 | 0.21                                | 2.06E-06 |
| SMU_0207c | transcriptional regulator                       | 0.21        | 4.95E-07 | 0.18                                | 3.06E-07 |
| SMU_0208c | DNA binding protein, FtsK/SpoIIIE family        | 0.19        | 1.02E-07 | 0.16                                | 4.75E-08 |
| SMU_0209c | hypothetical protein                            | 0.19        | 6.46E-06 | 0.15                                | 3.12E-06 |
| SMU_0210c | hypothetical protein                            | 0.16        | 8.23E-08 | 0.13                                | 5.43E-08 |
| SMU_0211c | hypothetical protein                            | 0.26        | 2.16E-05 | 0.21                                | 1.26E-05 |
| SMU_0212c | hypothetical protein                            | 0.35        | 6.15E-04 | 0.32                                | 5.76E-04 |
| SMU_0213c | hypothetical protein                            | 0.41        | 1.60E-04 | 0.39                                | 2.11E-04 |
| SMU_0214c | hypothetical protein                            | 0.28        | 2.50E-06 | 0.25                                | 2.87E-06 |

|           |                                              |      |          |      |          |
|-----------|----------------------------------------------|------|----------|------|----------|
| SMU_0215c | hypothetical protein                         | 0.31 | 6.94E-05 | 0.21 | 1.53E-05 |
| SMU_0216c | hypothetical protein                         | 0.33 | 1.17E-04 | 0.27 | 8.05E-05 |
| SMU_0217c | Streptococcus-specific protein               | 0.44 | 1.02E-04 | 0.43 | 1.67E-04 |
| SMU_0433  | transcriptional regulator                    |      |          | 2.01 | 8.71E-04 |
| SMU_0434  | conserved hypothetical protein               |      |          | 2.05 | 1.89E-03 |
| SMU_0593  | perR, peroxidase regulator                   | 0.03 | 2.92E-11 | 0.01 | 7.53E-12 |
| SMU_0594  | hypothetical protein                         | 0.12 | 1.59E-08 | 0.14 | 2.19E-08 |
| SMU_0670  | citB, aconitate hydratase; aconitase A       | 0.45 | 1.45E-04 | 0.46 | 4.56E-04 |
| SMU_0700c | gpmb, phosphoglycerate mutase                | 2.13 | 2.11E-05 | 2.28 | 1.56E-05 |
| SMU_0702c | ydbF, transcriptional regulator              |      |          | 2.34 | 1.82E-05 |
| SMU_0849  | rpmA, 50S ribosomal protein L27              |      |          | 2.22 | 8.61E-05 |
| SMU_0958  | hypothetical protein                         |      |          | 2.09 | 1.59E-03 |
| SMU_1249c | hypothetical protein                         |      |          | 2.23 | 1.72E-03 |
| SMU_1296  | yghU, glutathione S-transferase              |      |          | 2.06 | 2.46E-03 |
| SMU_1319c | conserved hypothetical protein               | 2.33 | 6.62E-05 | 3.55 | 1.21E-06 |
| SMU_1321c | conserved hypothetical protein               | 2.04 | 1.27E-05 | 2.69 | 4.29E-07 |
| SMU_1457  | mlb, dTDP-glucose-4,6-dehydratase            |      |          | 2.32 | 2.70E-05 |
| SMU_1502c | conserved hypothetical protein               |      |          | 2.35 | 2.84E-03 |
| SMU_1750c | hypothetical protein                         | 0.41 | 1.22E-03 | 0.46 | 3.22E-03 |
| SMU_1752c | hypothetical protein                         | 0.30 | 1.58E-05 | 0.35 | 6.54E-05 |
| SMU_1753c | CRISPR2-Cas related                          | 0.38 | 6.18E-06 | 0.40 | 7.75E-06 |
| SMU_1754c | CRISPR2-Cas related                          | 0.40 | 1.08E-06 | 0.34 | 1.28E-07 |
| SMU_1755c | CRISPR2-Cas related                          | 0.38 | 2.93E-06 | 0.37 | 1.95E-06 |
| SMU_1757c | CRISPR2-Cas related                          | 0.44 | 4.29E-06 | 0.42 | 2.10E-06 |
| SMU_1758c | CRISPR2-Cas related                          | 0.40 | 4.94E-05 | 0.31 | 3.27E-06 |
| SMU_1760c | conserved hypothetical protein               |      |          | 0.29 | 4.33E-05 |
| SMU_1761c | conserved hypothetical protein               |      |          | 0.30 | 2.11E-05 |
| SMU_1762c | conserved hypothetical protein               |      |          | 0.28 | 7.72E-06 |
| SMU_1763c | CRISPR2-Cas related                          | 0.39 | 3.47E-04 | 0.27 | 9.51E-06 |
| SMU_1764c | conserved hypothetical protein               | 0.45 | 1.36E-03 | 0.26 | 1.29E-05 |
| SMU_1907  | hypothetical protein                         |      |          | 0.48 | 4.10E-03 |
| SMU_1946  | conserved hypothetical protein               |      |          | 2.02 | 8.38E-04 |
| SMU_1961c | levD, fructose-specific Enzyme IIA component |      |          | 0.39 | 3.19E-03 |
